# Supplementary material
Source: MDPI journal article supplement (https://www.mdpi.com/2313-0105/9/1/50)
Supplement: s1 [file s1]

## **Supporting Information**

### **Ni/Fe bimetallic ions co-doped manganese dioxide cathode materials for aqueous zinc-ion batteries**

*Feifei Gao<sup>†</sup>, Wenchao Shi<sup>†</sup>, Bowen Jiang<sup>†</sup>, Zhenzhi Xia, Lei Zhang and Qinyou An\**

*State Key Laboratory of Advanced Technology for Materials Synthesis and Processing,*

*Wuhan University of Technology, Wuhan, 430070, China*

*\* Correspondence: anqinyou86@whut.edu.cn*

*† These authors contributed equally to this work.*

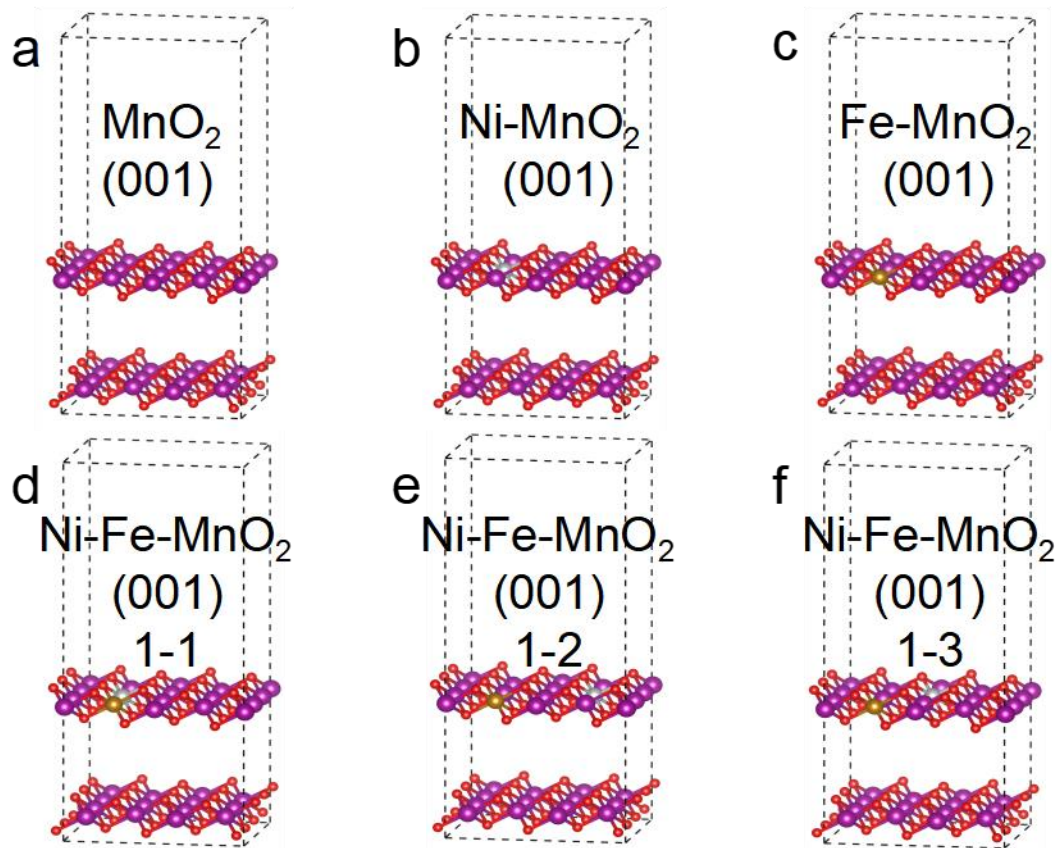

**Figure S1.** (a-f) Six structural models for the first-principles calculations: (a)  $\text{MnO}_2$ , (b)  $\text{Ni-MnO}_2$ , (c)  $\text{Fe-MnO}_2$ , (d)  $\text{Ni-Fe-MnO}_2$  (1-1), (e)  $\text{Ni-Fe-MnO}_2$  (1-2), (f)  $\text{Ni-Fe-MnO}_2$  (1-3).

**Table S1.** The minimum formation energy for three different NFMO structural models.

| Structure             | Ni-Fe-MnO <sub>2</sub> | Ni-Fe-MnO <sub>2</sub> | Ni-Fe-MnO <sub>2</sub> |
|-----------------------|------------------------|------------------------|------------------------|
|                       | 1-1                    | 1-2                    | 1-3                    |
| Formation energy (eV) | 4.86986                | 5.00333                | 5.81854                |

The structural models of different occupation positions of Fe and Ni atoms were optimized and calculated their minimum formation energy. The formula for the formation energy of the Fe-Ni-MnO<sub>2</sub> structure is defined as follows:

$$E_f = E_{TM/Slab} - \frac{E_{TM}}{N_{TM}} - E_{Slab} \quad (1)$$

Here,  $E_f$  is the formation energy of the Fe-Ni-MnO<sub>2</sub> structure.  $E_{TM/Slab}$  is the total energy of transition metal doped on slab.  $E_{TM}$  is the total energy of transition metal bulk.  $N_{TM}$  is the number of transition metal ions.  $E_{Slab}$  is the total energy of pristine slab. We calculate the minimum formation energy of the Ni-Fe-MnO<sub>2</sub> (1-1), Ni-Fe-MnO<sub>2</sub> (1-2) and Ni-Fe-MnO<sub>2</sub> (1-3) structures as 4.87 eV, 5.00 eV and 5.82 eV, respectively, according to formulas (1). The minimum formation energy for three different Ni-Fe-MnO<sub>2</sub> structure models is provided in Table S1. Obviously, the formation energy of the Ni-Fe-MnO<sub>2</sub> (1-1) structure is lower than that of Ni-Fe-MnO<sub>2</sub> (1-2) and Ni-Fe-MnO<sub>2</sub> (1-3) structures, which indicates that the Ni-Fe-MnO<sub>2</sub> (1-1) structure is more stable than the Ni-Fe-MnO<sub>2</sub> (1-2) and Fe-Ni-MnO<sub>2</sub> (1-3) structures. It may be easier to synthesize the Ni-Fe-MnO<sub>2</sub> (1-1) structure in experimental conditions. Thus, the Ni-Fe-MnO<sub>2</sub> (1-1) structure is considered the most reasonable structure for theoretical calculation in this work.

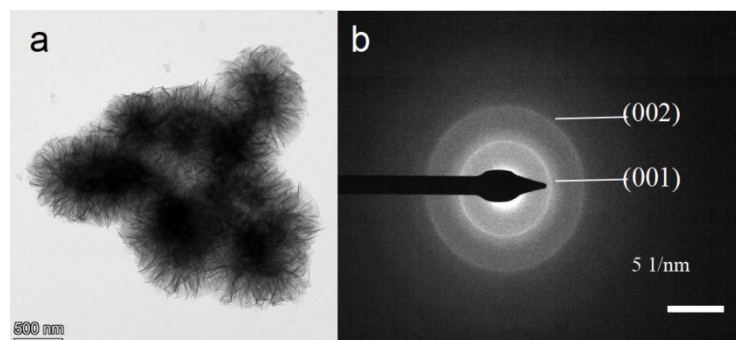

**Figure S2.** (a) TEM images and (b) SAED patterns of the NFMO sample.

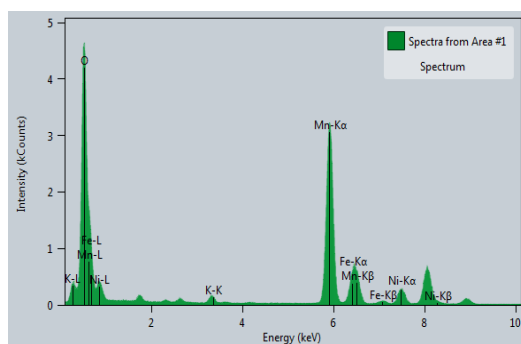

**Figure S3.** EDS analysis result for the marked area of TEM.

**Table S2.** Element composition analysis of NFMO.

| Z  | Element | Family | Atomic Fraction (%) | Atomic Error(%) | Mass Fraction(%) | Mass Error (%) | Fit error (%) |
|----|---------|--------|---------------------|-----------------|------------------|----------------|---------------|
| 8  | O       | K      | 67.79               | 6.84            | 38.05            | 2.55           | 0.48          |
| 19 | K       | K      | 0.97                | 0.20            | 1.33             | 0.25           | 0.38          |
| 25 | Mn      | K      | 25.63               | 4.29            | 49.39            | 7.37           | 0.28          |
| 26 | Fe      | K      | 3.19                | 0.53            | 6.25             | 0.93           | 0.30          |
| 28 | Ni      | K      | 2.42                | 0.40            | 4.98             | 0.74           | 0.58          |

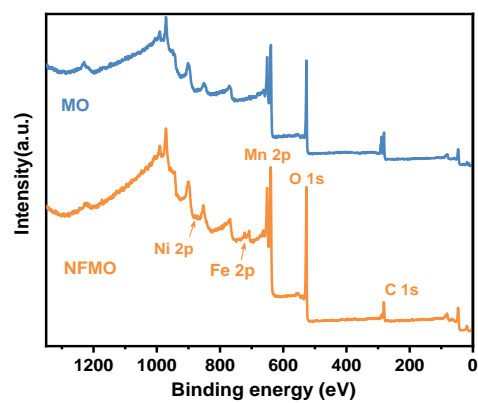

**Figure S4.** XPS characterization of survey spectrum.

**Table S3.** ICP analysis of the four cathode materials (MO, NMO, FMO and NFMO).

| Sample | Mn (w%)     | K (w%)     | Ni (w%)     | Fe (w%)    | Mn:Ni<br>molar ratio | Mn:Fe<br>molar ratio |
|--------|-------------|------------|-------------|------------|----------------------|----------------------|
| MO     | 49.11365011 | 6.60615936 | 0           | 0          | 0                    | 0                    |
| NMO    | 49.32362234 | 3.29900069 | 10.17830249 | 0          | 1: 0.1932            | 0                    |
| FMO    | 48.86557160 | 3.22774565 | 0           | 9.72753283 | 0                    | 1: 0.1958            |
| NFMO   | 47.41089504 | 1.87722062 | 4.92516906  | 4.63014636 | 1: 0.0972            | 1: 0.0961            |

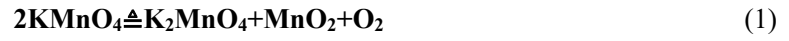

The formula (1) is the reaction equation of MnO<sub>2</sub> preparation.

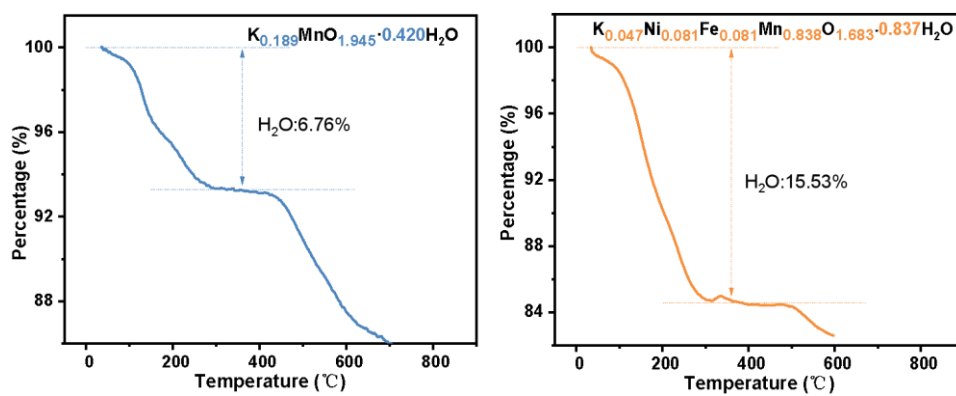

**Figure S5.** Exact molecular formula of  $\delta$ -MnO<sub>2</sub> based on the TGA, XPS and ICP results. (a)  $\delta$ -MnO<sub>2</sub> without Ni-doping:  $K_{0.189}MnO_{1.945} \cdot 0.420H_2O$ , (b)  $\delta$ -MnO<sub>2</sub> with Ni and Fe-doping:  $K_{0.047}Ni_{0.081}Fe_{0.081}Mn_{0.838}O_{1.683} \cdot 0.837H_2O$ .



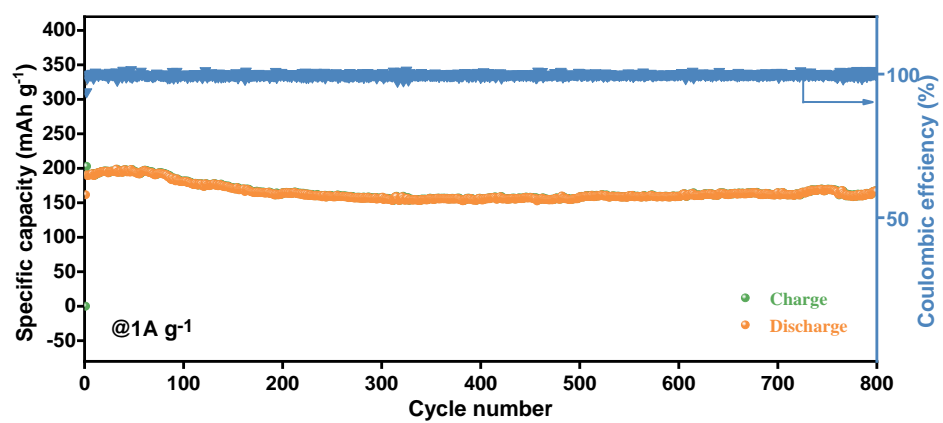

**Figure S6.** Cycling performance and the corresponding coulombic efficiency of NFMO at 1.0A g<sup>-1</sup>.

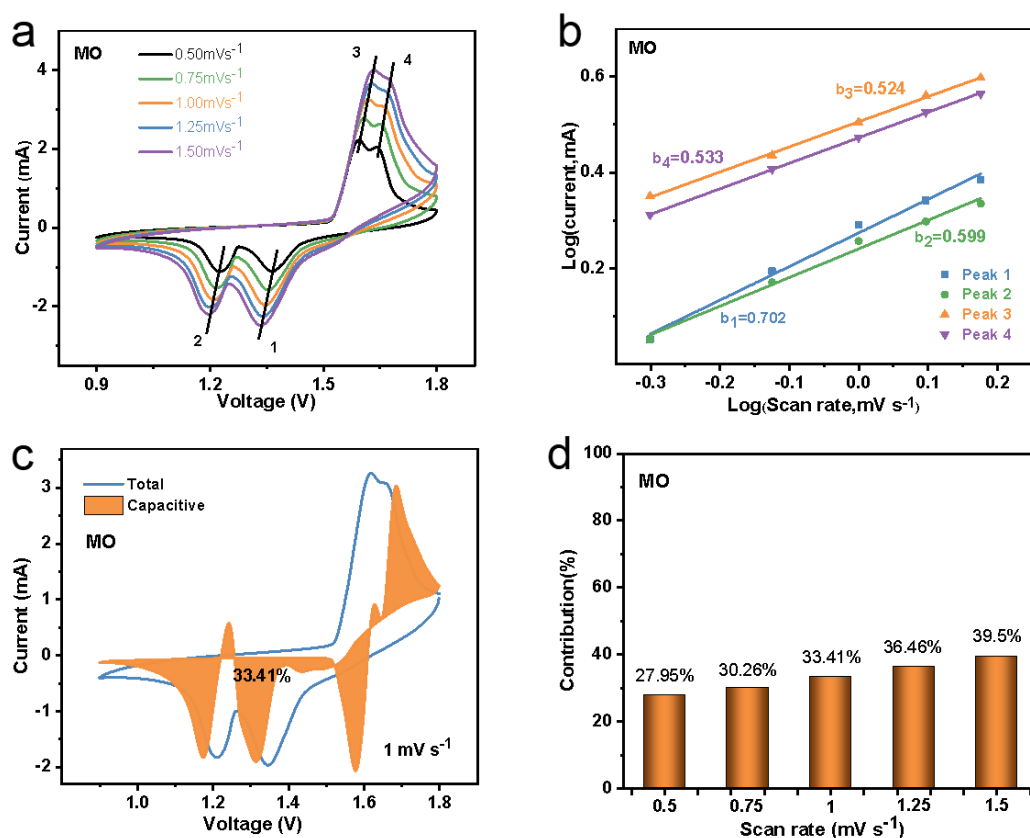

**Figure S7.** (c) CV curves of the MO electrode at various scan rates. (d) The corresponding plots of log (current) vs log (scan rate) of MO at each redox peak, and corresponding  $b$  values. (e) Capacitive and diffusion-controlled percentage of MO at a scan rate of 1 mV s<sup>-1</sup>. (f) Contribution ratios of the capacitive capacities and diffusion-controlled capacities in the MO electrode.

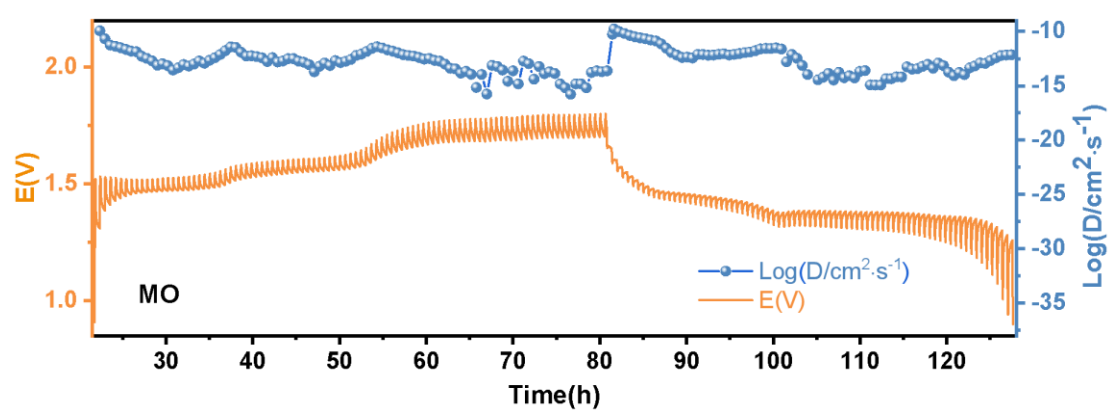

**Figure S8.** GITT curves and Diffusion coefficients calculated of MO at charge/discharge states.

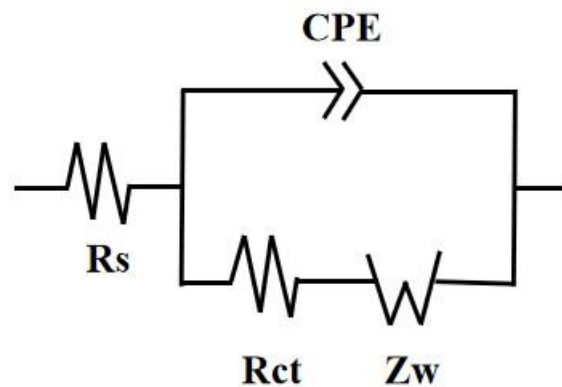

**Figure S9.** Equivalent circuit model.

The fitting results of EIS and equivalent circuit (EC) model are shown in Figure 4b and S9. The EC model is composed of three parts:  $R_{ct}$ ,  $R_s$  and Warburg impedance elements. The non-ideal capacitor  $Q$  and capacitor  $C$  are mutually connected in parallel, besides,  $C$  and  $Q$  are replaced by constant phase element (CPE) to simplify the model.

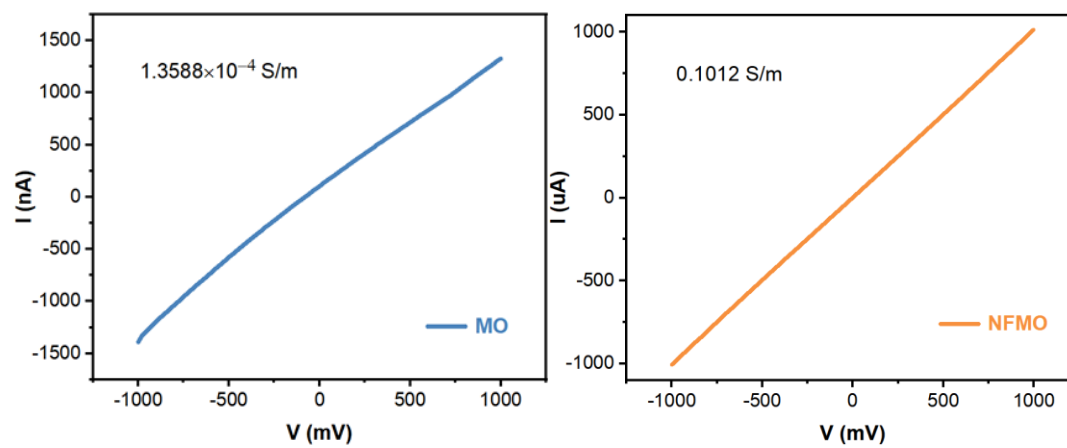

**Figure S10.** Voltage-current curve of MO and NFMO.

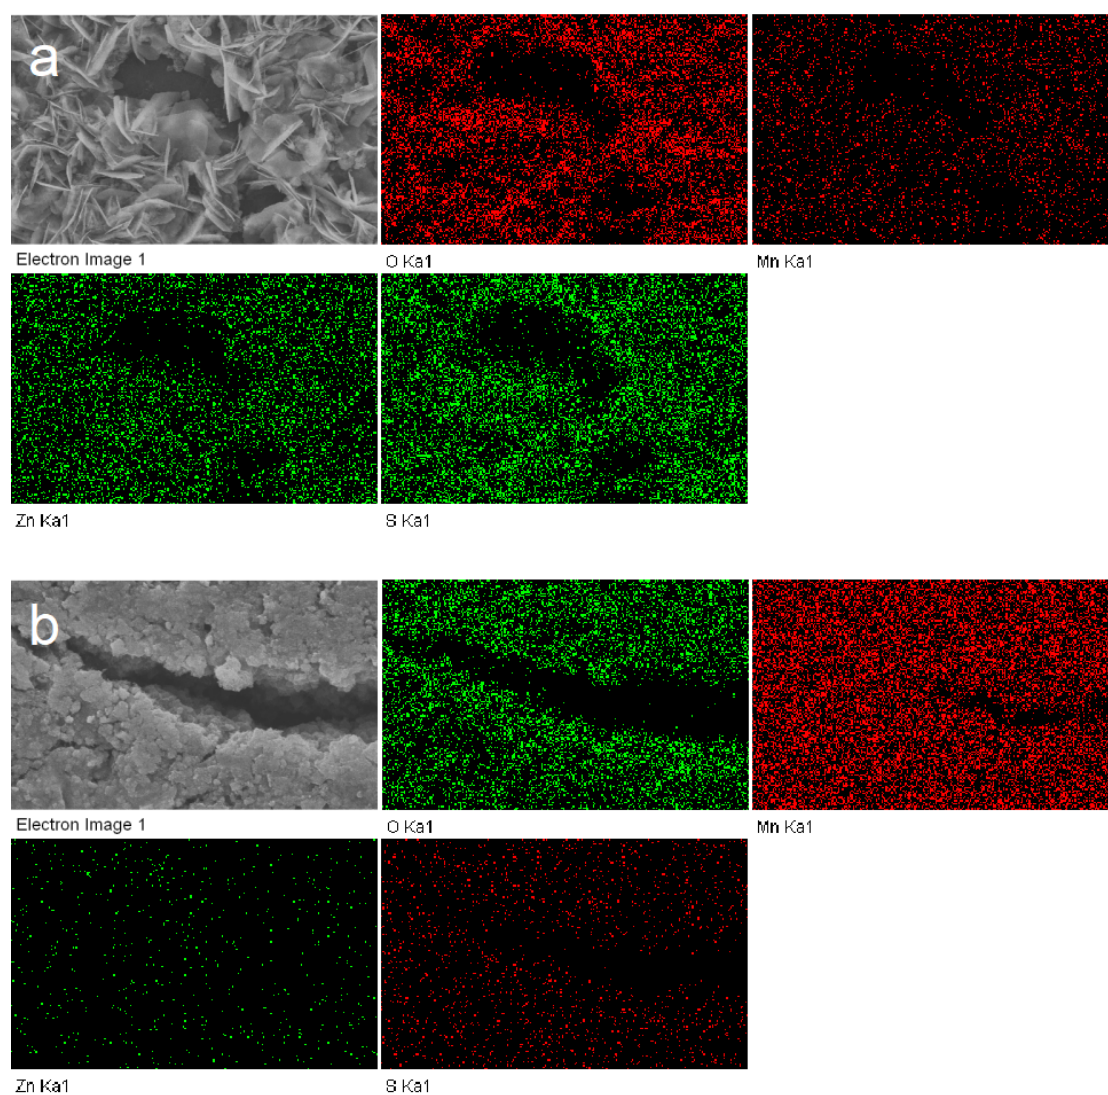

**Figure S11.** (a) Images for SEM and elemental mapping images of NFMO discharged to 0.9 V in the first cycle. (b) Images for SEM and elemental mapping images of NFMO charged to 1.8 V in the first cycle.

**Table S4.** Comparison of cathode performance in aqueous ZIBs between this work and other recent reports.

| Cathode                                                                        | Electrolyte                                           | Voltage window | Specific capacity/Cycling performance                                                                      | Ref          |
|--------------------------------------------------------------------------------|-------------------------------------------------------|----------------|------------------------------------------------------------------------------------------------------------|--------------|
| Fe/ $\alpha$ -MnO <sub>2</sub> @PPy                                            | 2 M ZnSO <sub>4</sub><br>+ 0.1 M<br>MnSO <sub>4</sub> | 0.8-1.9 V      | 270 mA h g <sup>-1</sup> (100 mA g <sup>-1</sup> )                                                         | [1]          |
| Ni <sub>0.052</sub> K <sub>0.112</sub> MnO <sub>2</sub> ·0.136H <sub>2</sub> O | 3 M ZnSO <sub>4</sub> +<br>0.2 M MnSO <sub>4</sub>    | 1-1.8 V        | 130 mA h g <sup>-1</sup> (3080 mA g <sup>-1</sup> ;<br>10C)                                                | [2]          |
| Ag-doped MnO <sub>2</sub>                                                      | 2 M ZnSO <sub>4</sub> +<br>0.1 M MnSO <sub>4</sub>    | 0.8–1.8 V      | 315 mA h g <sup>-1</sup> (50 mA g <sup>-1</sup> );<br>171 mA h g <sup>-1</sup> (1 A g <sup>-1</sup> )      | [3]          |
| K <sub>0.36</sub> H <sub>0.26</sub> MnO <sub>2</sub> ·0.28H <sub>2</sub> O     | 3 M ZnSO <sub>4</sub> +<br>0.2 M MnSO <sub>4</sub>    | 1-1.8 V        | 329.8 mAh g <sup>-1</sup> (0.1C);<br>100.1mAh g <sup>-1</sup> (10C)                                        | [4]          |
| Cu-doped MnO <sub>2</sub>                                                      | 2 M ZnSO <sub>4</sub> +<br>0.1 M MnSO <sub>4</sub>    | 1-1.8 V        | 320mAh g <sup>-1</sup> (0.5C)                                                                              | [5]          |
| Mg <sub>0.9</sub> Mn <sub>3</sub> O <sub>7</sub> ·2.7H <sub>2</sub> O          | 3 M ZnSO <sub>4</sub> +<br>0.1 M MnSO <sub>4</sub>    | 0.85–1.85 V    | 312 mAh g <sup>-1</sup> (0.2 A g <sup>-1</sup> );                                                          | [6]          |
| NFMO                                                                           | 3 M ZnSO <sub>4</sub> +<br>0.2 M MnSO <sub>4</sub>    | 0.9-1.8 V      | 382 mA h g <sup>-1</sup> (100 mA g <sup>-1</sup> );<br>181 mA h g <sup>-1</sup> (3000 mA g <sup>-1</sup> ) | This<br>work |

## Reference

1. Xu, J.W.; Gao, Q.L.; Xia, Y.M.; Lin, X.S.; Liu, W.L.; Ren, M.M.; Kong, F.G.; Wang, S.J.; Lin, C. High-performance reversible aqueous zinc-ion battery based on iron-doped alpha-manganese dioxide coated by polypyrrole. *J. Colloid Interface Sci.* **2021**, *598*, 419-429, doi:10.1016/j.jcis.2021.04.057.
2. Zhao, Q.; Song, A.; Zhao, W.; Qin, R.; Ding, S.; Chen, X.; Song, Y.; Yang, L.; Lin, H.; Li, S., et al. Boosting the Energy Density of Aqueous Batteries via Facile Grotthuss Proton Transport. *Angew. Chem., Int. Ed.* **2021**, *60*, 4169-4174, doi:10.1002/anie.202011588.
3. Liao Y.; Yang C.; Xu Q.; Zhao W.; Zhao J.; Wang K.; Chen H. Ag-Doping Effect on MnO<sub>2</sub> Cathodes for Flexible Quasi-Solid-State Zinc-Ion Batteries. *Batteries* **2022**, *8*, 267, doi:10.3390/batteries8120267.
4. Ding, S.; Liu, L.; Qin, R.; Chen, X.; Song, A.; Li, J.; Li, S.; Zhao, Q.; Pan, F. Progressive "Layer to Hybrid Spinel/Layer" Phase Evolution with Proton and Zn<sup>2+</sup> Co-intercalation to Enable High Performance of MnO<sub>2</sub>-Based Aqueous Batteries. *ACS Appl. Mater. Interfaces* **2021**, *13*, 22466-22474, doi:10.1021/acsami.1c03671.
5. Fenta, F.W.; Olbasa, B.W.; Tsai, M.-C.; Weret, M.A.; Zegeye, T.A.; Huang, C.-J.; Huang, W.-H.; Zeleke, T.S.; Sahalie, N.A.; Pao, C.-W., et al. Electrochemical transformation reaction of Cu–MnO in aqueous rechargeable zinc-ion batteries for high performance and long cycle life. *J. Mater. Chem. A* **2020**, *8*, 17595-17607, doi:10.1039/d0ta04175k.
6. Li, J.; Luo, N.; Kang, L.; Zhao, F.; Jiao, Y.; Macdonald, T.J.; Wang, M.; Parkin, I.P.; Shearing, P.R.; Brett, D.J.L., et al. Hydrogen-Bond Reinforced Superstructural Manganese Oxide As the Cathode for Ultra-Stable Aqueous Zinc Ion Batteries. *Adv. Energy Mater.* **2022**, 2201840, doi:10.1002/aenm.202201840.
